# Supplementary material for: DNAzyme-mediated fluorescence signal variation of DNA-Ag nanoclusters and construction of an aptasensor for ATP
Source: Royal Society of Chemistry journal article supplement (doi:10.1039/d4ay01608d), 2024-01-01
Supplement: d4ay01608d1.pdf [file d4ay01608d1.pdf]

## Supplementary information

### **DNAzyme-manipulated fluorescence signal variation of DNA-AgNCs and construction of an aptasensor for ATP**

Shixin Cai<sup>a</sup>, Mingrui Li<sup>a</sup>, Xinqi Hu<sup>a</sup>, Shuhua Gui<sup>b,\*</sup>, Menglu Li<sup>c</sup>, Yuting Zhang<sup>a</sup>,

Xiaoli Wang<sup>a</sup>, Nandi Zhou<sup>a,\*</sup>

<sup>a</sup> School of Biotechnology and Key Laboratory of Carbohydrate Chemistry and Biotechnology of Ministry of Education, Jiangnan University, Wuxi 214122, China

<sup>b</sup> Department of Neurology, Affiliated Hospital of Jiangnan University, Wuxi 214122, China

<sup>c</sup> Department of Urology, Jiangnan University Medical Center (Wuxi No. 2 People's Hospital), Wuxi 214000, China

\* Corresponding authors. E-mail: gsh001@sina.com (S. Gui);  
zhounandi@jiangnan.edu.cn (N. Zhou)

**Table S1. Sequences used in this work.**

| Name | Sequences                                                                      |
|------|--------------------------------------------------------------------------------|
| TC-1 | 5'-ATAGTCCCCCCTACTAT-3'                                                        |
| TC-2 | 5'-ACTCACTAT/rA/GGAAGAGATGATAGTCCCCCCTACTAT-3'                                 |
|      | 5'-                                                                            |
| TC-3 | AAAAAAAAAAAAAAAAATTTTACTCACTAT/rA/GGAAGAGATGATAG<br>TCCCCCCTACTAT-3'           |
|      | 5'-                                                                            |
| TC-4 | AAAAAAAAAAAAAAAAATTTTACTCACTAT/rA/GGAAGAGATGTTTT<br>TATAGTCCCCCCTACTAT-3'      |
|      | 5'-                                                                            |
| TC-5 | AAAAAAAAAAAAAAAAATTTTACTCACTAT/rA/GGAAGAGATGTTTT<br>TTTTTTATAGTCCCCCCTACTAT-3' |
| Apt  | 5'-ACCTGGGGGAGTATTGCGGAGGAAGGTTATT-3'                                          |
| cDNA | 5'-ACCTTCCTCCGCAAATGA-3'                                                       |
|      | 5'-CATCTCTTCTCCGAGCCGGTCGAAAATAGTGAGT                                          |
| HP   | CGGAGAAGAGATGTTGCGGAGGAAG-3'                                                   |

**Table S2. Comparison of the performance of the aptasensor in this work and the relevant methods in the references for ATP detection.**

| Detection Method                               | LOD ( $\mu\text{M}$ ) | Detection range ( $\mu\text{M}$ ) | References |
|------------------------------------------------|-----------------------|-----------------------------------|------------|
| Fluorescence<br>DNA-Cu/Ag NCs                  | 7                     | $2 \times 10^3 - 1.8 \times 10^4$ | 1          |
| Light-up DNA-scaffolded<br>silver nanoclusters | 810                   | $1 \times 10^3 - 6 \times 10^3$   | 2          |
| DNA-Ag NC fluorescence<br>light-up system      | 440                   | $0 - 4 \times 10^6$               | 3          |
| DNA-AgNCs fluorescence light-<br>up system     | 3                     | $3 \times 10^3 - 2.4 \times 10^4$ | 4          |
| Fluorescence DNA-AgNCs                         | 4.46                  | $2.5 \times 10^1 - 1 \times 10^3$ | This work  |

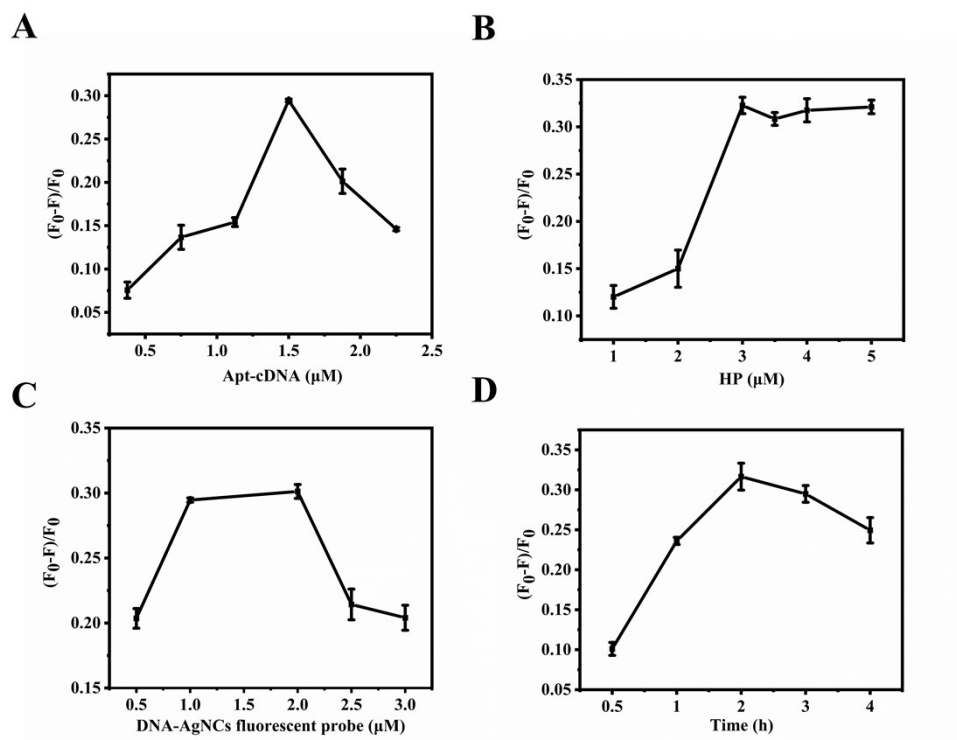

**Fig. S1.** Optimization of the experimental conditions. (A) The concentration of Apt-cDNA (molar ratio of Apt and cDNA set as 1:1), (B) The concentration of HP, (C) The concentration of the DNA-AgNCs fluorescent probes, and (D) The incubation time of DNAzyme.

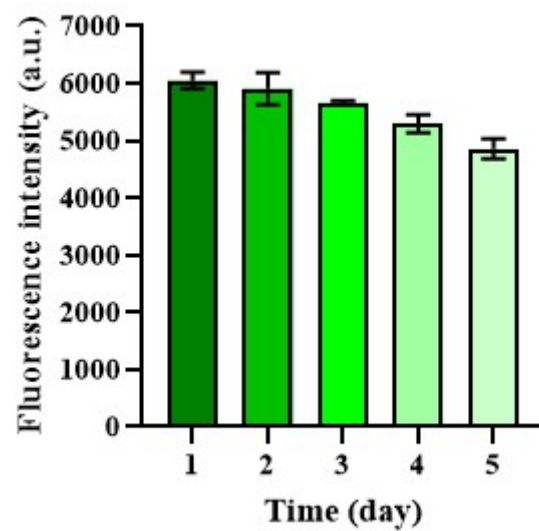

**Fig. S2.** Investigation on the stability of DNA-AgNCs in human serum.

## References

- 1 B. Zhang and C. Wei, *Anal. Bioanal. Chem.*, 2020, **412**, 2529-2536.
- 2 J. Ma, B. Yin and B. Ye, *Analyst*, 2016, **141**, 1301-1306.
- 3 J. Xu and C. Wei, *Biosens. Bioelectron.*, 2017, **87**, 422-427.
- 4 Y. Li, Z. Meng, Y. Liu and B. Zhang, *RSC Adv.*, 2024, **14**, 5594-5599.
